# Supplementary material
Source: PubMed Central journal article supplement (PMC4618020)

## SUPPLEMENTAL MATERIAL

**Supplemental Table 1: Summary of surface ECG analysis 4 weeks of age with 1 or 3% isoflurane anesthesia.**

| <b>genotype</b> | <b>Isoflu-<br/>rane</b> | <b>SCL (ms)</b> | <b>HR<br/>(bpm)</b> | <b>PR (ms)</b> | <b>QRS (ms)</b> | <b>Qtc (ms)</b> |
|-----------------|-------------------------|-----------------|---------------------|----------------|-----------------|-----------------|
| W/W (n=5)       | 1%                      | 143 ± 9         | 423 ± 22            | 33.2 ± 0.8     | 9.1 ± 0.4       | 23.9 ± 1.4      |
| W/ R52G (n=6)   | 1%                      | 141 ± 4         | 428 ± 12            | 36.5 ± 0.6*    | 11.8 ± 0.4**    | 26.0 ± 0.6      |
| W/W (n=5)       | 3%                      | 139 ± 7         | 434 ± 23            | 41.5 ± 1.5     | 10.3 ± 0.3      | 26.0 ± 1.0      |
| W/R52G (n=6)    | 3%                      | 146 ± 8         | 416 ± 23            | 54.2 ± 2.2**   | 12.2 ± 0.4**    | 29.0 ± 1.2      |

SCL, sinus cycle length; HR, heart rate; bpm. beats per minute.

Mean ± SE. *P*, *P* value between two different mouse genotypes. \**P* < 0.05, \*\**P* < 0.01

**Figure S1. Profound effects of higher dose of isoflurane (3%) anesthesia on prolongation of PR interval and QRS duration in *Nkx2-5<sup>+R52G</sup>* mice.** Representative surface ECG recordings obtained from 4 weeks old control *Nkx2-5<sup>+/+</sup>* (top) and *Nkx2-5<sup>+R52G</sup>* (bottom) mice either with 1% or 3% isoflurane anesthesia. Signal-averaged ECG waves were utilized for analysis shown in Supplemental Table S1. HR, heart rate.

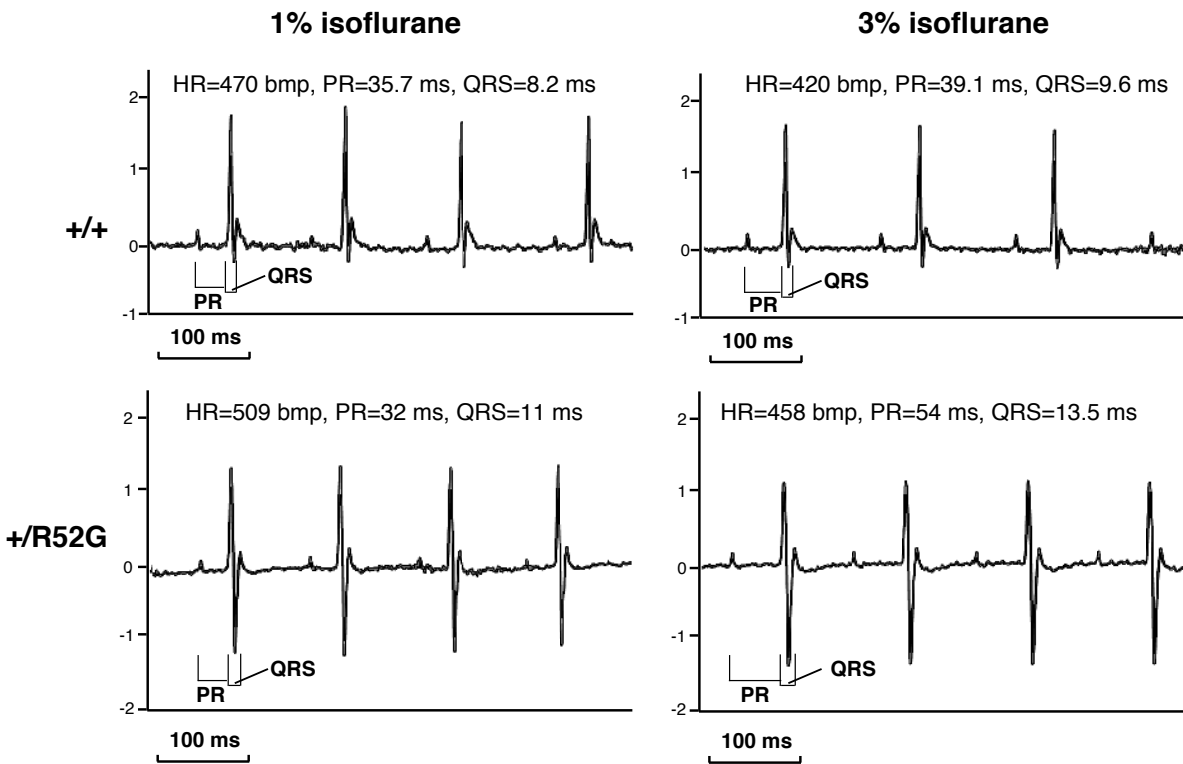

**Figure S2:** Representative images of serial tissue sections positively (+) or negatively (-) stained with HCN4, connexin 40, connexin 43, and Na<sub>v</sub>1.5 (green) in AV node, penetrating AV bundle (traced by white dots) and left bundle branch (arrowheads) from 4 week-old mice. Anti-actinin antibody was used for co-immunostaining (red). Of note, connexin40 staining was not evident in penetrating AV bundle and left bundle branch differing from P1 hearts demonstrated in Figure 6E.

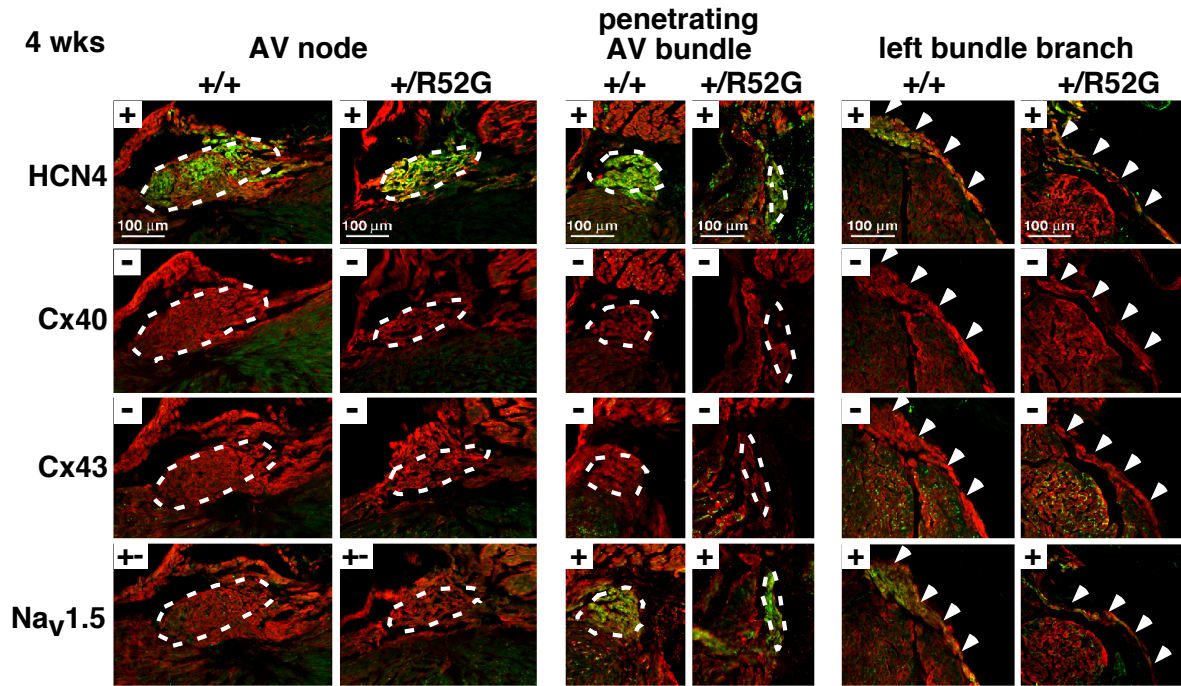

Supplement: NIHMS714062-supplement-002720_-_Supplemental_Material.pdf [file NIHMS714062-supplement-002720_-_Supplemental_Material.pdf]
